## Cell-based analysis of CAD variants identifies individuals likely to benefit from uridine therapy

Francisco del Caño-Ochoa, PhD<sup>#,1,2</sup>, Bobby G. Ng, BS<sup>#,3</sup>, Malak Abedalthagafi, MD<sup>4</sup>, Mohammed Almannai, MD<sup>5</sup>, Ronald D. Cohn, MD<sup>6,7,8,9</sup>, Gregory Costain, MD<sup>6,10</sup>, Orly Elpeleg, MD<sup>11</sup>, Henry Houlden, MD, PhD<sup>12</sup>, Ehsan Ghayoor Karimiani, MD, PhD<sup>13</sup>, Pengfei Liu, PhD<sup>14,15</sup>, M. Chiara Manzini, PhD<sup>16</sup>, Reza Maroofian, PhD<sup>12</sup>, Michael Muriello, MD<sup>17,18</sup>, Ali Al-Otaibi, MD<sup>19</sup>, Hema Patel, MD<sup>20</sup>, Edvardson Shimon, MD<sup>21</sup>, V. Reid Sutton, MD<sup>22</sup>, Mehran Beiraghi Toosi, MD<sup>23</sup>, Lynne A. Wolfe, MS, CRNP, BC<sup>24</sup>, Jill A. Rosenfeld, MS<sup>14,15</sup>, Hudson H. Freeze, PhD<sup>\*,3</sup> and Santiago Ramón-Maiques, PhD<sup>\*,1,2</sup>

<sup>1</sup> Genome Dynamics and Function Program, Centro de Biología Molecular Severo Ochoa, CSIC-UAM, Nicolás Cabrera 1, 28049 Madrid, Spain.

<sup>2</sup> Group 739, Centro de Investigación Biomédica en Red de Enfermedades Raras (CIBERER)- Instituto de Salud Carlos III, Valencia, Spain.

<sup>3</sup> Human Genetics Program, Sanford Burnham Prebys Medical Discovery Institute, La Jolla, CA, USA.

<sup>4</sup> Genomics Research Department, Saudi Human Genome Project, King Fahad Medical City and King Abdulaziz City for Science and Technology, Riyadh, Saudi Arabia.

<sup>5</sup> Section of Medical Genetics, Children's Hospital, King Fahad Medical City, Riyadh 11525, Saudi Arabia.

<sup>6</sup> Division of Clinical and Metabolic Genetics, The Hospital for Sick Children, Toronto, ON, Canada.

<sup>7</sup> Division of Paediatric Medicine, The Hospital for Sick Children, Toronto, ON, Canada.

<sup>8</sup> Department of Paediatrics, University of Toronto, Toronto, ON, Canada.

<sup>9</sup> Department of Molecular Genetics, University of Toronto, Toronto, ON, Canada.

<sup>10</sup> Centre for Genetic Medicine, The Hospital for Sick Children, Toronto, ON, Canada.

<sup>11</sup> Department of Genetics, Hadassah-Hebrew University Medical Center, Jerusalem 91120, Israel.

<sup>12</sup> Department of Neuromuscular disorders, UCL Institute of Neurology, Queen Square, London, WC1N 3BG, UK; University College, London.

<sup>13</sup> Molecular and Clinical Sciences Institute, St. George's, University of London, Cranmer Terrace London, SW17 0RE, UK.

<sup>14</sup> Department of Molecular and Human Genetics, Baylor College of Medicine, Houston, TX, USA.

<sup>15</sup> Baylor Genetics Laboratories, Houston, TX, USA

<sup>16</sup> Department of Neuroscience and Cell Biology and Child Health Institute of New Jersey, Rutgers Robert Wood Johnson Medical School, New Brunswick, NJ, USA.

<sup>17</sup> Department of Pediatrics / Division of Genetics, Medical College of Wisconsin; Milwaukee, WI, USA.

<sup>18</sup> Genomic Science and Precision Medicine Center, Medical College of Wisconsin; Milwaukee, WI, USA.

<sup>19</sup> Department of Pediatric Neurology, National Neuroscience Institute, King Fahad Medical City, Riyadh, Saudi Arabia.

<sup>20</sup> Department of Neurology (Section of pediatric neurology) Children's Hospital of Wisconsin, Medical College of Wisconsin, Milwaukee, WI, USA

<sup>21</sup> Pediatric Neurology Unit, Hadassah-Hebrew University Medical Center, Jerusalem 91240, Israel

<sup>22</sup> Department of Molecular & Human Genetics Baylor College of Medicine & Texas Children's Hospital, Houston, TX, USA.

<sup>23</sup> Department of Pediatric Diseases, Faculty of Medicine, Mashhad University of Medical Sciences, Mashhad, Iran.

<sup>24</sup> Undiagnosed Diseases Program, Common Fund, National Institutes of Health, Bethesda, MD, USA.

# These authors contributed equally

\* Co-corresponding authors:

Santiago Ramón-Maiques

Email: [santiago.ramon@cbm.csic.es](mailto:santiago.ramon@cbm.csic.es)

Tel: +34-911964698

Hudson H. Freeze

Email: [HUDSON@pbpdiscovery.org](mailto:HUDSON@pbpdiscovery.org)

Tel: +1 (858)6463142

### **CONFLICT OF INTEREST**

The authors declare no conflict of interest.

## ABSTRACT

**Purpose:** Pathogenic autosomal recessive variants in *CAD*, encoding the multienzymatic protein initiating pyrimidine *de novo* biosynthesis, cause a severe inborn metabolic disorder treatable with a dietary supplement of uridine. This condition is difficult to diagnose given the large size of *CAD* with over 1000 missense variants and the non-specific clinical presentation. We aimed to develop a reliable and discerning assay to assess the pathogenicity of *CAD* variants and to select affected individuals that might benefit from uridine therapy.

**Methods:** Using CRISPR/Cas9, we generated a human *CAD*-knockout cell line that requires uridine supplements for survival. Transient transfection of the knockout cells with recombinant *CAD* restores growth in absence of uridine. This system determines missense variants that inactivate *CAD* and do not rescue the growth phenotype.

**Results:** We identified 25 individuals with biallelic variants in *CAD* and a phenotype consistent with a *CAD* deficit. We used the *CAD*-knockout complementation assay to test a total of 34 variants, identifying 16 as deleterious for *CAD* activity. Combination of these pathogenic variants confirmed 11 subjects with a *CAD* deficit, for whom we describe the clinical phenotype.

**Conclusions:** We designed a cell-based assay to test the pathogenicity of *CAD* variants, identifying 11 *CAD* deficient individuals, who could benefit from uridine therapy.

## Keywords

Congenital disorder of glycosylation; *de novo* pyrimidine biosynthesis; carbamoyl phosphate synthetase; aspartate transcarbamoylase; dihydroorotase

## INTRODUCTION

*CAD* encodes a multienzymatic cytoplasmic protein harboring four functional domains, each catalyzing one of the initial reactions for *de novo* biosynthesis of pyrimidine nucleotides: glutamine amidotransferase (GLN), carbamoyl-phosphate synthetase (SYN), aspartate transcarbamoylase (ATC) and dihydroorotase (DHO)<sup>1-3</sup> (Figure 1). This metabolic pathway is essential for nucleotide homeostasis, cell growth and proliferation<sup>4</sup>. Defects in dihydroorotate dehydrogenase (DHODH) or UMP synthetase (UMPS), the enzymes catalyzing the next steps in the pathway after *CAD*, associate with severe human disorders (Miller syndrome [OMIM 263750]<sup>5</sup> and orotic aciduria [OMIM 258900]<sup>6</sup>). In 2015, we identified a single individual with early infantile epileptic encephalopathy and two variants in *CAD*, one, an in-frame deletion of an exon and the second, a missense variant (p.R2024Q) in a highly conserved residue<sup>7</sup>. Metabolic analysis of subject fibroblasts showed impaired *CAD* activity-dependent incorporation of <sup>3</sup>H-labeled aspartate into nucleic acids and nucleotide sugars, precursors for glycoprotein synthesis. Uridine supplements corrected this *CAD*-associated congenital disorder of glycosylation (CDG) [OMIM 616457], suggesting a simple potential treatment. In two subsequent reports, five affected individuals from four unrelated families with similar symptoms showed likely pathogenic variants in *CAD*, but no functional studies were done<sup>8,9</sup>. However, uridine treatment of three suspected individuals showed striking improvement, with cessation of seizures and significant progression from minimally conscious state to communication and walking. Recently, uridine triacetate (Xuriden) was approved by the FDA to treat hereditary orotic aciduria<sup>10</sup>; presumably, it could be used to treat affected individuals with *CAD* deficiency.

The attractiveness of a simple therapy brought 25 suspected individuals to our attention for evaluation. Unfortunately, the metabolic labeling assay using <sup>3</sup>H-labeled aspartate has a low resolution and a narrow dynamic range. To have a more reliable and discerning assay, we tested the ability of each variant to rescue growth of a human *CAD*-knockout cell line which requires uridine supplements for survival. Surprisingly, only 11 of 25 suspected individuals had pathologic variants and would potentially benefit from uridine supplements. We describe the development of this functional assay, the general clinical phenotype and analysis of these individuals. We caution about relying on current prediction programs to assess pathogenicity of variants for this large multifunctional enzyme.

## MATERIALS AND METHODS

### Clinical data

Informed consent was provided for all subjects in accordance with each clinician's individual institution. For those individuals where samples were provided, written consent was provided for Sanford Burnham Prebys Medical Discovery Institute approved IRB-2014-038-17.

### CRISPR/Cas9 plasmid

pSpCas9 (BB)-2A-Puro (PX459) vector (Addgene), encoding Cas9, was digested with BbsI and purified with Qiaquick Gel Extraction kit (Qiagen). Complementary dsDNA oligonucleotides encoding sgRNA, designed to target the first exon of *CAD*, were purchased (Sigma) with 5' overhangs complementary to the BbsI site and an extra G base to favor transcription<sup>11</sup> (Table S1). The oligonucleotides were phosphorylated with T4 polynucleotide kinase (NEB), annealed and inserted in the linearized vector with T4 DNA ligase (NEB). The construct was amplified in TOP10 *E. coli* cells (ThermoFisher), verified by sequencing and purified with a Plasmid Midi kit (Qiagen).

### GFP-CAD plasmid

Enhanced green fluorescent protein (GFP) coding sequence was obtained by HindIII and KpnI digestion of pPEU2 vector (kindly provided by Dr. Nick Berrow, IRB Barcelona), and ligated into pCDNA3.1 (Promega) linearized with same restrictions enzymes. The resulting plasmid (pCDNA3.1-GFP) was verified by sequencing. Human *CAD* was PCR amplified from cDNA (Open Biosystems clone ID 5551082) using specific primers (Table S1) and ligated with In-Fusion (Clontech) into NotI linearized pCDNA3.1-GFP. The resulting plasmid (pCDNA3.1-GFP<sub>hu</sub>CAD) encodes an N-terminal histidine-tagged GFP followed in-frame by human *CAD*. Site-directed mutagenesis was carried out following the QuickChange protocol (Stratagene) and a pair of specific oligonucleotides (Table S1) and PfuUltra High-Fidelity DNA polymerase (Agilent).

### Generating a *CAD* knockout cell line

Human U2OS (bone osteosarcoma) cells were grown in DMEM (Lonza), 10% fetal bovine serum (FBS; Sigma), 2 mM L-glutamine (Lonza), and 50 U·ml<sup>-1</sup> penicillin and 50 µg·ml<sup>-1</sup> streptomycin (Invitrogen), at 5% CO<sub>2</sub> and 37 °C. One day before transfection, 1.5–2 x 10<sup>5</sup> U2OS cells in a final volume

of 500  $\mu$ l of medium were transferred to 24-well plates to reach approximately 50-80% confluence. For transfection, 2  $\mu$ g of DNA in 50  $\mu$ l of DMEM and 50  $\mu$ l of FuGene6 transfection reagent (Promega) at 1mg·ml<sup>-1</sup> in DMEM were incubated separately for 5 min at room temperature, and then mixed together and incubated at room temperature for an additional 10 min. The 100  $\mu$ l mix was added to the wells drop by drop, followed by a 16 h incubation at 37°C and 5% CO<sub>2</sub>. 24 h post transfection, puromycin was added for one week to select transfected cells and enhance Cas9 cleavage. Media was supplemented with 30  $\mu$ M uridine (Sigma) to allow growth of CAD deficient cells. Individual cells were isolated by serial dilution in 96-well plates, seeded into 24-well plates and expanded for 2-3 weeks. To identify CAD-deficient clones, a replica of the plate was grown in media with 10% fetal bovine macroserum (FBM) without uridine, instead of FBS. FBM was prepared as reported<sup>12</sup>. In brief, 50 ml of heat-inactivated FBS were dialyzed against 1 L of tap water for 1 day at 4°C using SpectraPor #3 dialysis tubing with a molecular weight cutoff of 3,500 Da (Spectrum Laboratories, Inc., USA), supplemented with NaCl (9 g per liter), sterilized with a 0.22  $\mu$ m filter and stored at -20 °C. Disruption of *CAD* was confirmed by Sanger sequencing. For this, exon 1 of *CAD* was PCR amplified with specific primers (Table S1), inserted in ZeroBlunt vector (Invitrogen) and sequenced with M13 primer. CAD-deficient cells were confirmed by Western blot and immunofluorescence microscopy using a monoclonal antibody (Cell Signaling Technology, #93925).

### **Growth complementation assay**

U2OS *CAD*-KO cells were transfected with wild-type (WT) or mutated pcDNA3.1-GFP<sub>huCAD</sub> using FuGene6 as detailed above. One day after transfection, 1 x 10<sup>5</sup> cells were seeded by duplicate in 24-well plates using media supplemented with 10% FBM (without uridine). Every 24 h, cells from one well were trypsinized and counted using a Countess II FL Automated Cell Counter (Thermo) or a Neubauer chamber. Doubling time was calculated using an online tool (<http://www.doubling-time.com/compute.php>).

## RESULTS

### Validation of a growth complementation assay in *CAD* knockout cells

We wanted to create a *CAD* knockout (KO) cell line that could be used to assess the pathogenicity of *CAD* variants. Using CRISPR/Cas9 technology, we knocked out *CAD* in human U2OS cells by selecting an isogenic clone that introduced a homozygous c.70delG frameshift [p.Ala24Profs\*27] within exon 1 (Figure 2a-c). We verified by Western blot and immunofluorescence that *CAD*-KO cells do not express *CAD* (Figure 2c,d). As expected, these cells are unable to grow in absence of uridine, but proliferate at similar rate as WT cells in media supplemented with 30  $\mu$ M exogenous uridine (Figure 2e). Next, we transiently transfected KO cells with a plasmid encoding human *CAD* fused to the enhanced green fluorescent protein (GFP) at the N-terminus (Figure 2f). *CAD*-KO cells expressing GFP-*CAD* proliferated in uridine-deprived conditions at a normal rate (doubling time  $\sim$ 1 day), whereas cells transfected with GFP alone did not grow (Figure 2g).

To confirm that all four enzymatic activities of *CAD* were needed for *de novo* pyrimidine synthesis and cell growth in absence of uridine, we measured the proliferation of *CAD*-KO cells transfected with GFP-*CAD* bearing well-known inactivating mutations for each activity (Figure 2g). The transfected inactivated variants in the SYN (p.H627N, p.E682Q)<sup>13,14</sup>, DHO (p.D1686N)<sup>15</sup> and ATC (p.R2024Q)<sup>7,16</sup> domains failed to rescue the growth of *CAD*-KO cells. In turn, the GLN inactive mutant (p.C252S)<sup>17</sup> showed a partial rescue, with transfected cells doubling every  $\sim$ 2.5 days, suggesting that free-ammonia can, to some extent, contribute to the synthesis of carbamoyl phosphate (Figure 1).

### Identification and impact of potential *CAD* variants

Since *CAD* encodes a large protein with 2,225 amino acids covering 44 exons (Figure 2a), it is not surprising that all previously reported (n=6) affected individuals were identified using Next-Generation Sequencing (NGS)<sup>7-9</sup>. Likewise, using NGS we identified 25 potential *CAD* deficient individuals based on the presence of biallelic variants and a clinical phenotype similar to previously reported individuals (Table 1). Ultimately, we tested 34 variants of uncertain significance (VUS) in our validated knockout assay.

To assess the damaging potential of variants found in subjects, we transfected *CAD*-KO cells with GFP-*CAD* bearing the clinical variants and monitored proliferation in uridine-deprived conditions (Figure 3a-d). Each newly constructed plasmid carrying an individual-specific variant required complete



sequencing of the ~8 kb *GFP-CAD* cDNA to ensure no additional changes were introduced during PCR. We also verified the efficiency of the transfection (>95%) and that the mutated proteins were being expressed by imaging the GFP fluorescence signal in the *CAD*-KO cells two days after transfection (data not shown).

Three out of the seven variants found in the GLN domain, p.M33R, p.G296E and p.N320S, showed a partial rescue (Figure 3a). The doubling time was similar to the cells transfected with the GLN inactivating variant p.C252S (Figure 2g), indicating that these variants impair the GLN domain. On the other hand, cells transfected with SYN variants p.G526R, p.R742Q, p.P796T, p.V999M, and p.R1033Q failed to proliferate, whereas the variant p.P1171Q showed a partial rescue (Figure 3b). Out of the eight variants of the DHO domain tested, only two, p.K1556T and p.R1785C, failed to restore cell growth (Figure 3c). For the ATC variants, four mutations, p.R1986Q, p.L1987V and p.P2186S, failed to rescue the cells, whereas the p.E2128K allowed a partial rescue (Figure 3d). Finally, transfection with the two variants found at the linker between the DHO and ATC domains (p.R1854Q and p.R1857Q) restored normal growth (Figure 3d).

Based on these results, we concluded that the failure to rescue the growth phenotype of *CAD*-KO cells in absence of uridine indicates that 16 out of the 34 variants tested have a deleterious effect on *CAD* activity and therefore are pathogenic.

Interestingly, significant differences were seen when comparing the results of the KO assay to three popular *in silico* prediction programs (SIFT<sup>18</sup>, Polyphen2<sup>19</sup>, CADD<sup>20</sup>) (Table 1). All three prediction programs agreed with each other for 20/34 variants (59 % - 15/34 pathogenic, 5/34 benign variants). Yet only 38 % (13/34) (9/34 pathogenic, 4/34 benign) of the variants agreed in all three prediction programs and the complementation assay. We used a CADD PHRED score of above 20, which places a variant in the top 1% deleterious variants in the human genome, as potentially pathogenic. Below 20 we considered likely benign.

The mechanisms of inactivation of the pathogenic variants will be described in a separate study.

## Clinical

To date, only six affected individuals from five unrelated families have been identified with *CAD* deficiencies<sup>7-9</sup>. The clinical presentation of these individuals is general in nature, but all showed varying severity of neurological involvement including developmental delays and/or seizures. Furthermore, all

were reported to have hematological abnormalities including abnormal red blood cells (anisopoikilocytosis) and anemia. Two of the six are reported to be deceased, while the remaining four were placed on uridine supplementation.

In this study, we identified 25 individuals with biallelic variants in *CAD*, who presented with a phenotype potentially consistent with *CAD* deficiency. We used the *CAD*-KO complementation assay described above to determine the pathogenicity of each variant identified and ultimately confirmed eleven *CAD*-deficient subjects (Table 1, Figure 3e).

Detailed clinical information was available and provided for ten of the eleven confirmed individuals (Figure 4). Consistent with the initial *CAD* deficient individuals<sup>7,8</sup>, all ten individuals presented here showed varying neurological abnormalities. All (10/10, 100 %) had intellectual and development delays, while 9/10 (90 %) had seizure activity. Gastrointestinal complications ranging from feeding problems, reflux and recurrent vomiting were seen in half (5/10) of the individuals. Facial dysmorphism, hypotonia and ataxia were also seen in half of those affected. While the sample size of previously identified subjects is small, 5/5 (100 %) did show hematological abnormalities. In contrast, our cohort reported only 4/10 (40 %) with these. Less affected systems included the skeletal (3/10) and cardiac (2/10).

In our cohort, one individual was noted to have passed away (CDG-0118). However, four families (0017, 0104, 0118, 0123) were noted to have a family history of multiple affected siblings with a similar presentation. From these four families, three had at least one sibling with a similar disorder who expired.

Due to the lack of detailed clinical information, CDG-0117 was not included in the final summary. However, he was noted to have structural brain abnormalities and a family history significant for premature death in two affected female siblings. Importantly, genomic DNA was available for one of the two deceased siblings and was found to also carry the same homozygous c.5957G>A [p.R1986Q] *CAD* variant.

One family (CDG-0112) had a dual diagnosis of *CAD* deficiency and a recessive intellectual developmental disorder with cardiac arrhythmia (OMIM 617173). Within this family, both affected siblings harbored a homozygous pathogenic c.249+3A>G [p.Asp84Valfs31\*] variant in *GNB5*<sup>21</sup>, but only the male sibling carried the pathogenic homozygous c.3098G>A [p.R1033Q] variant in *CAD*. Given the

clinical similarities of these two disorders, especially the neurological features, we cannot determine which symptoms are due to specifically the CAD variant alone.

## DISCUSSION

The prospect of a simple, non-toxic therapy for a potentially lethal disorder excites all stakeholders: patients, caretakers, physicians and scientists. Identifying the first CAD-deficient individual and showing that uridine corrects cellular defects set the stage for the highly successful use of uridine in two CAD-deficient individuals<sup>7,8</sup>. As a result, and given the non-specific clinical presentation of CAD-deficient individuals, we received many requests to test subject fibroblasts in a functional assay that involves labelling cells with <sup>3</sup>H-aspartate to measure the CAD-dependent contribution to *de novo* pyrimidine synthesis (Figure 1). However, the assay has a limited dynamic range (~2 fold) and many determinations left us ambivalent and uncertain about the diagnosis. Thus, a new robust and reliable biochemical assay was required to evaluate the pathogenicity of CAD variants.

We designed a CAD knockout cell line whose growth was dependent on added uridine (Figure 2) and then tested each variant for its ability to rescue uridine-independent growth (Figure 3a-d). Most of the variants either fully rescued growth, meaning the variants were benign, or were unable to rescue growth completely, showing they were pathologic variants. Only a few showed partial rescue, which we interpret to mean a damaging variant that decreases, but does not eliminate the activity. When each variant was combined based on individual-specific genotyping, we determined which individuals indeed had a CAD deficiency and therefore predict which ones would benefit from uridine therapy (Figure 3e and Table 1). This is a stringent prediction based on each single variant. It does not test the specific combination of alleles found in each individual, but we assume the combination of two variants would not cancel each other to generate a fully capable CAD protein. If this were the case, it is unlikely that the individuals themselves would show the expected clinical phenotype. Surprisingly only 11 of the 25 suspected individuals appear to be authentic cases based on this functional assay.

We also compared our assay results to three prediction programs designed to assess the pathogenicity of each variant (Table 1). There was considerable disagreement between the programs for many variants, and the programs produced both false positive and false negative results. Based on these findings, we suggest that any suspected CAD cases first be validated using this (or similar) biochemical assay. And it is likely that more putative CAD deficient cases will be suspected, since CAD

has ~1,020 missense rare variants in the public gnomAD browser (Ver2.1.1) database<sup>22</sup> (accessed 2020.1.23 with 125,748 exomes and 15,708 genomes). Some families may choose to start uridine therapy without benefit of these results. That is certainly possible since the uridine is available to families and subjects over the internet. Barring the consumption of impure products, uridine is unlikely to be harmful. On the other hand, using uridine supplements in unconfirmed subjects may offer false hopes and complicate the interpretation of successful uridine therapy.

## **ACKNOWLEDGEMENTS**

This work was supported by The Rocket Fund, by R01DK99551 to HHF, and by MICIU grant BFU2016-80570-R and RTI2018-098084-B-100 (AEI/FEDER, UE). The University of Washington Center for Mendelian Genomics for exome sequencing and analysis of CDG - 0117. We would like to thank all the families for providing biological samples and their continued support. We would like to also thank the clinicians who provided information for individuals that were determined not to be CAD deficient.

## REFERENCES

1. Del Cano-Ochoa F, Moreno-Morcillo M, Ramon-Maiques S. CAD, A Multienzymatic Protein at the Head of de Novo Pyrimidine Biosynthesis. *Subcell Biochem.* 2019;93:505-538.
2. Del Cano-Ochoa F, Ramon-Maiques S. The multienzymatic protein CAD leading the de novo biosynthesis of pyrimidines localizes exclusively in the cytoplasm and does not translocate to the nucleus. *Nucleosides Nucleotides Nucleic Acids.* 2020:1-15.
3. Jones ME. Pyrimidine nucleotide biosynthesis in animals: genes, enzymes, and regulation of UMP biosynthesis. *Annual review of biochemistry.* 1980;49(1):253-279.
4. Sigoillot FD, Berkowski JA, Sigoillot SM, Kotsis DH, Guy HI. Cell cycle-dependent regulation of pyrimidine biosynthesis. *J Biol Chem.* 2003;278(5):3403-3409.
5. Ng SB, Buckingham KJ, Lee C, et al. Exome sequencing identifies the cause of a mendelian disorder. *Nat Genet.* 2010;42(1):30-35.
6. Smith LH, Sullivan M, Huguley CM. Pyrimidine Metabolism in Man. Iv. The Enzymatic Defect of Orotic Aciduria. *J Clin Invest.* 1961;40(4):656-664.
7. Ng BG, Wolfe LA, Ichikawa M, et al. Biallelic mutations in CAD, impair de novo pyrimidine biosynthesis and decrease glycosylation precursors. *Human molecular genetics.* 2015;24(11):3050-3057.
8. Koch J, Mayr JA, Alhaddad B, et al. CAD mutations and uridine-responsive epileptic encephalopathy. *Brain.* 2017;140(Pt 2):279-286.
9. Zhou L, Xu H, Wang T, Wu Y. A patient with CAD deficiency responsive to uridine and literature review. *Front Neurol.* 2020;11(64):5.
10. In brief: Uridine triacetate (Xuriden) for hereditary orotic aciduria. *The Medical letter on drugs and therapeutics.* 2016;58(1491):e49.
11. Ran FA, Hsu PD, Wright J, Agarwala V, Scott DA, Zhang F. Genome engineering using the CRISPR-Cas9 system. *Nat Protoc.* 2013;8(11):2281-2308.
12. Patterson D, Carnright DV. Biochemical genetic analysis of pyrimidine biosynthesis in mammalian cells: I. Isolation of a mutant defective in the early steps of de novo pyrimidine synthesis. *Somatic Cell Genet.* 1977;3(5):483-495.
13. Miles BW, Mareya SM, Post LE, Post DJ, Chang SH, Raushel FM. Differential roles for three conserved histidine residues within the large subunit of carbamoyl phosphate synthetase. *Biochemistry.* 1993;32(1):232-240.
14. Stapleton MA, Javid-Majd F, Harmon MF, et al. Role of conserved residues within the carboxy phosphate domain of carbamoyl phosphate synthetase. *Biochemistry.* 1996;35(45):14352-14361.
15. Grande-Garcia A, Lallous N, Diaz-Tejada C, Ramon-Maiques S. Structure, functional characterization, and evolution of the dihydroorotase domain of human CAD. *Structure.* 2014;22(2):185-198.
16. Ruiz-Ramos A, Velazquez-Campoy A, Grande-Garcia A, Moreno-Morcillo M, Ramon-Maiques S. Structure and Functional Characterization of Human Aspartate Transcarbamoylase, the Target of the Anti-tumoral Drug PALA. *Structure.* 2016;24(7):1081-1094.
17. Rubino SD, Nyunoya H, Lusty CJ. Catalytic domains of carbamyl phosphate synthetase. Glutamine-hydrolyzing site of Escherichia coli carbamyl phosphate synthetase. *J Biol Chem.* 1986;261(24):11320-11327.

18. Sim NL, Kumar P, Hu J, Henikoff S, Schneider G, Ng PC. SIFT web server: predicting effects of amino acid substitutions on proteins. *Nucleic Acids Res.* 2012;40(Web Server issue):W452-457.
19. Adzhubei IA, Schmidt S, Peshkin L, et al. A method and server for predicting damaging missense mutations. *Nat Methods.* 2010;7(4):248-249.
20. Rentzsch P, Witten D, Cooper GM, Shendure J, Kircher M. CADD: predicting the deleteriousness of variants throughout the human genome. *Nucleic Acids Res.* 2019;47(D1):D886-D894.
21. Lodder EM, De Nittis P, Koopman CD, et al. GNB5 Mutations Cause an Autosomal-Recessive Multisystem Syndrome with Sinus Bradycardia and Cognitive Disability. *Am J Hum Genet.* 2016;99(3):704-710.
22. Karczewski KJ, Francioli LC, Tiao G, et al. Variation across 141,456 human exomes and genomes reveals the spectrum of loss-of-function intolerance across human protein-coding genes. *bioRxiv.* 2019;p. 531210.

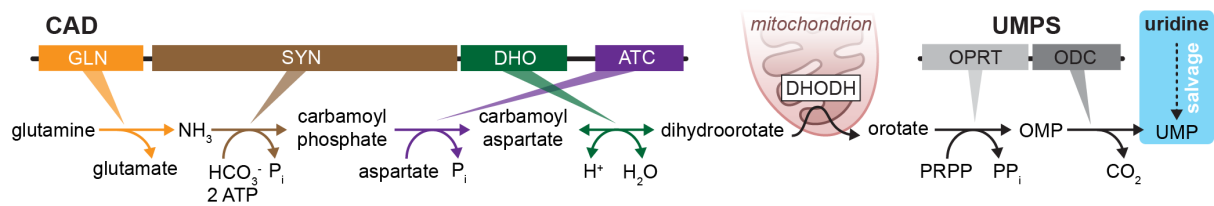

**Figure 1. Schematic of the pathway for *de novo* biosynthesis of the pyrimidine nucleotide uridine 5-monophosphate (UMP).** The initial enzymatic activities, glutaminase (GLN), carbamoyl phosphate synthetase (SYN), aspartate transcarbamoylase (ATC) and dihydroorotase (DHO) are fused into the multifunctional protein CAD. The next reaction after CAD is catalyzed by dihydroorotate dehydrogenase (DHODH), an enzyme anchored to the inner mitochondrial membrane. The last two steps are catalyzed by UMP synthase (UMPS), a bifunctional enzyme with orotate phosphoribosyl transferase (OPRT) and orotidine decarboxylase (ODC) activities. Alternatively, UMP can be obtained from uridine through salvage pathways (depicted in cyan).



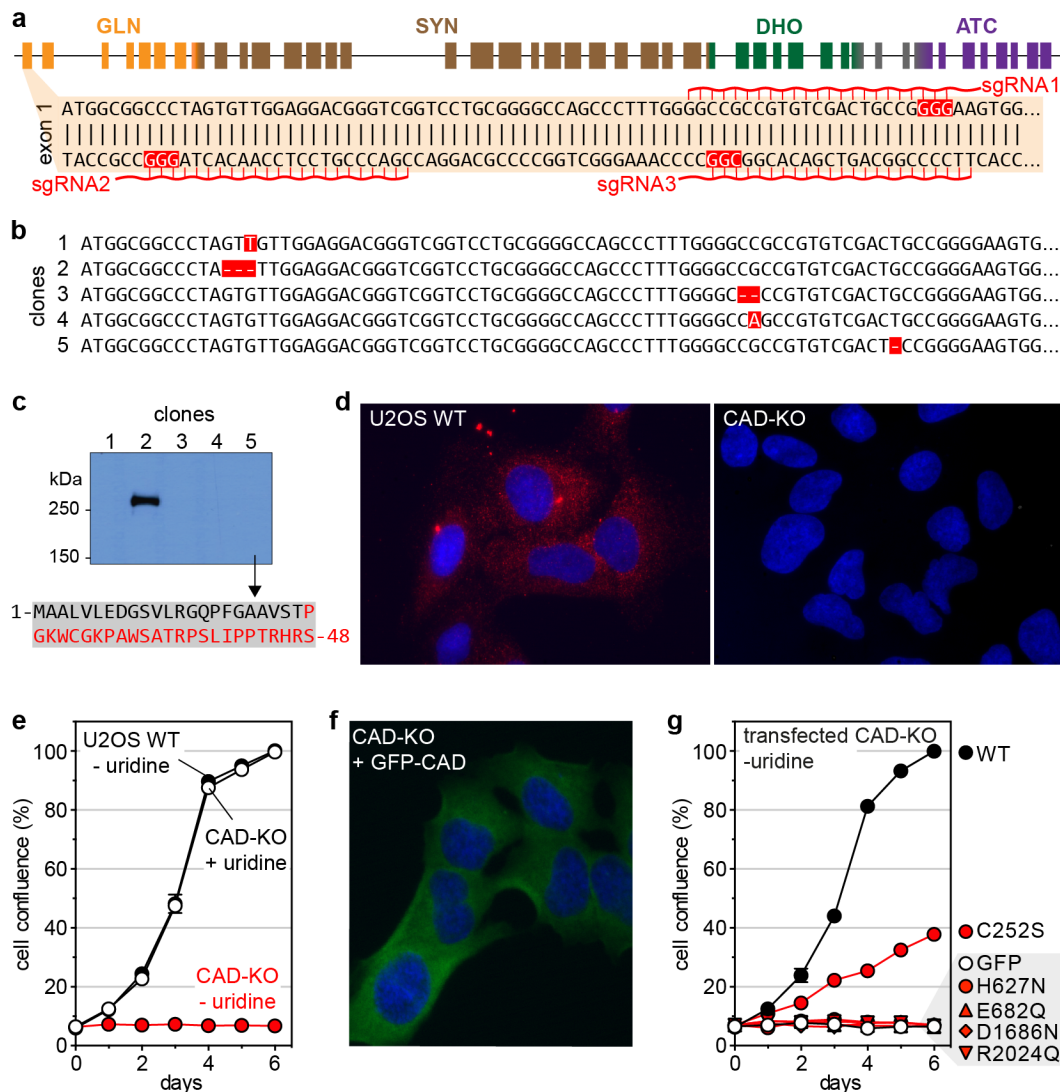

**Figure 2. Using CRISPR/Cas9 to knockout CAD in U2OS cells.** (a) Schematic representation of CAD locus, with 44 exons colored according to their respective functional domains; detail of the 5' region of exon 1, indicating the single guide RNA (sgRNAs) with protospacer adjacent motif (PAM) sequences in red boxes. (b) Sequencing of five clones selected after CRISPR-Cas9 editing shows insertions and deletions (highlighted in red) in exon 1. (c) Expression of CAD in total lysates of clones shown in (a) analyzed by Western blot with a monoclonal antibody. Clone #5, chosen as the CAD-KO cell for further studies, produces an early truncated CAD protein of 48 residues with an incorrect sequence colored in red. (d) Immunofluorescence of WT and CAD-KO U2OS cells, using a monoclonal antibody against CAD (red signal) and nuclear labelling with Hoechst (blue signal). (e) Proliferation assay of CAD-KO cells in media with or without uridine, compared to the growth of WT cells. (f) Imaging of CAD-KO cells transiently transfected with GFP-CAD, using GFP fluorescent signal (green) and Hoechst (blue). (g) Transfection of GFP-CAD rescues the growth phenotype of CAD-KO in uridine-deprived media. Cells transfected with GFP alone do not proliferate. Cells transfected with GFP-CAD variants bearing well-characterized inactivating mutations in the SYN, DHO or ATC domains fail to proliferate without uridine, whereas the inactivation of the GLN domain (mutation C252S) allows limited growth.

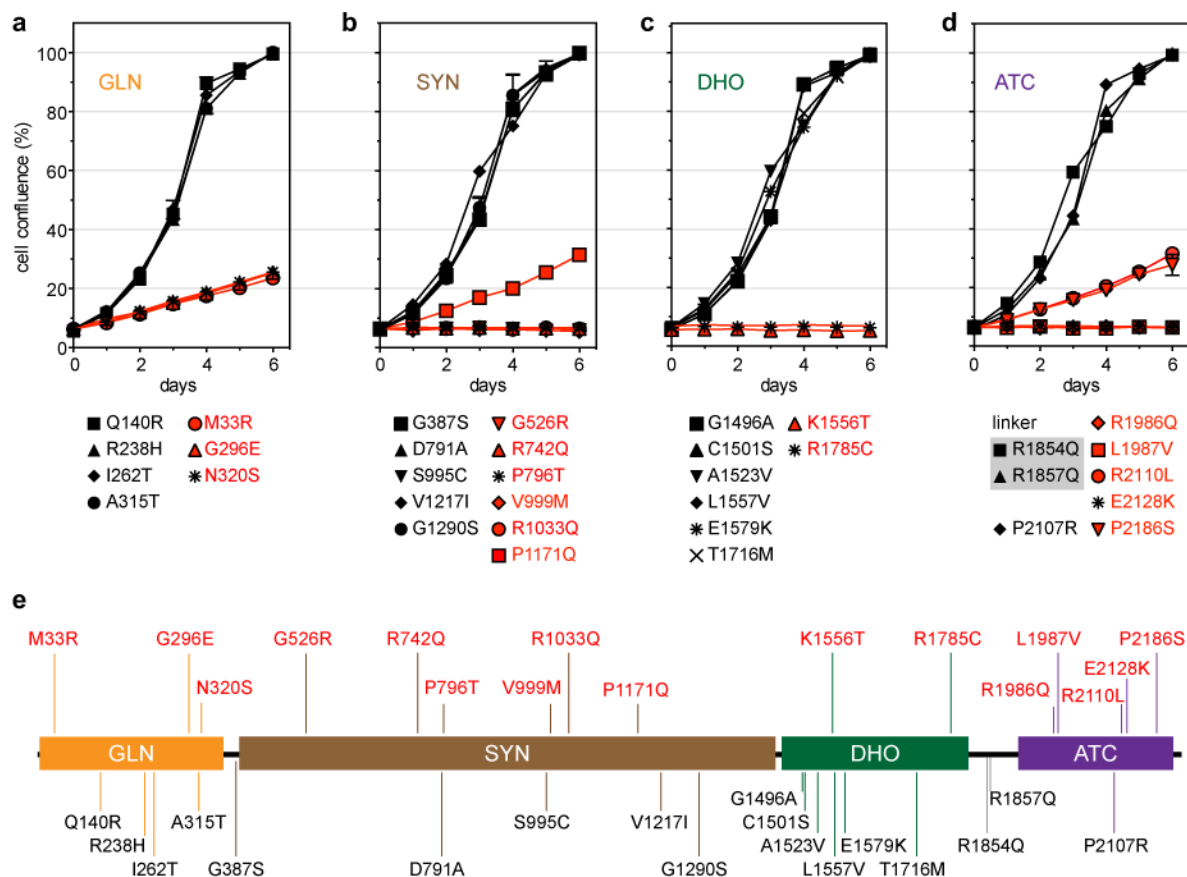

**Figure 3. Assessing the pathogenicity of CAD variants.** (a-d) Growth complementation assay of CAD-KO cells grown in absence of uridine and transfected with GFP-CAD bearing point mutations in the GLN (a), SYN (b), DHO (c) or ATC (d) domains. Mutations in the loop connecting the DHO and ATC domains are included in (d). Cell proliferation is represented as % confluence with respect to cells transfected with GFP-CAD WT. Each point represents the mean and standard deviation of three measurements, and all mutants were tested in at least two independent experiments. Mutations compromising CAD activity are colored in red. (e) Linear representation of CAD, mapping the inactivating (in red) and benign (in black) variants.

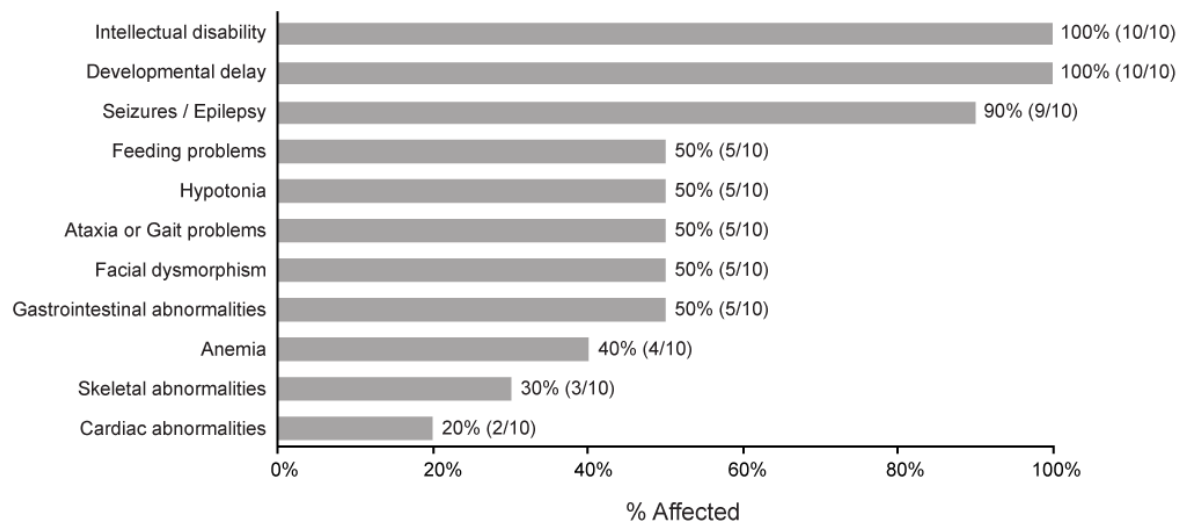

**Figure 4. Clinical summary for ten unreported CAD-deficient individuals.** Clinical information for 10 of the available subjects was collected and summarized as % affected.

**Table 1 – Summary of CAD variants.**

| ID <sup>a</sup> | cDNA <sup>b</sup> | Amino acid | SIFT category | SIFT value <sup>c</sup> | PolyPhen2 category | PolyPhen2 value <sup>c</sup> | CADD PHRED <sup>c</sup> | KO rescue results | gnomAD carriers/alleles |
|-----------------|-------------------|------------|---------------|-------------------------|--------------------|------------------------------|-------------------------|-------------------|-------------------------|
| Baylor - 001*   | c.2156+5G>A       | NA         | NA            | NA                      | NA                 | NA                           | 10.62                   | NA                | 4/251138                |
|                 | c.4667A>C         | p.K1556T   | tolerated     | 0.38                    | possibly_damaging  | 0.631                        | 24.1                    | <b>Pathogenic</b> | 1/251278                |
| Baylor - 002    | c.5147C>T         | p.T1716M   | deleterious   | 0                       | probably_damaging  | 0.982                        | 25.9                    | Benign            | 17/281494               |
|                 | c.5561G>A         | p.R1854Q   | tolerated     | 0.25                    | benign             | 0.186                        | 23.8                    | Benign            | 15/282772               |
| Baylor - 003    | c.2372A>C         | p.D791A    | deleterious   | 0.04                    | possibly_damaging  | 0.473                        | 26.8                    | Benign            | NA                      |
|                 | c.4487G>C         | p.G1496A   | deleterious   | 0                       | probably_damaging  | 0.999                        | 27                      | Benign            | NA                      |
| Baylor - 004    | c.713G>A          | p.R238H    | deleterious   | 0.05                    | benign             | 0.104                        | 18.27                   | Benign            | 109/282876              |
|                 | c.1159G>A         | p.G387S    | tolerated     | 0.67                    | benign             | 0                            | 7.152                   | Benign            | 11/251452               |
| Baylor - 005    | c.4501T>A         | p.C1501S   | tolerated     | 0.44                    | possibly_damaging  | 0.636                        | 23.8                    | Benign            | 1/251356                |
|                 | c.6556C>T         | p.P2186S   | deleterious   | 0                       | probably_damaging  | 0.999                        | 32                      | <b>Pathogenic</b> | NA                      |
| Baylor - 006    | c.419A>G          | p.Q140R    | tolerated     | 0.42                    | benign             | 0.029                        | 18.14                   | Benign            | 2/282842                |
|                 | c.5570G>A         | p.R1857Q   | tolerated     | 0.17                    | benign             | 0.022                        | 23.7                    | Benign            | 8/282788                |
| Baylor - 007    | c.943G>A          | p.A315T    | deleterious   | 0.01                    | probably_damaging  | 0.971                        | 26.4                    | Benign            | 4/251364                |
|                 | c.5353C>T         | p.R1785C   | deleterious   | 0                       | probably_damaging  | 0.994                        | 28.5                    | <b>Pathogenic</b> | 3/251030                |
| Baylor - 008    | c.785T>C          | p.I262T    | tolerated     | 0.15                    | benign             | 0.185                        | 22.7                    | Benign            | 7/282792                |
|                 | c.3868G>A         | p.G1290S   | tolerated     | 0.07                    | benign             | 0.058                        | 16.78                   | Benign            | 31/282488               |

|              |           |          |             |      |                   |       |       |                   |           |
|--------------|-----------|----------|-------------|------|-------------------|-------|-------|-------------------|-----------|
| Baylor - 009 | c.5147C>T | p.T1716M | deleterious | 0    | probably_damaging | 0.982 | 25.9  | Benign            | 17/281494 |
|              | c.5561G>A | p.R1854Q | tolerated   | 0.25 | benign            | 0.186 | 23.8  | Benign            | 15/282772 |
| Baylor - 010 | c.3649G>A | p.V1217I | deleterious | 0.02 | possibly_damaging | 0.483 | 25    | Benign            | 3/251356  |
|              | c.4568C>T | p.A1523V | tolerated   | 0.05 | benign            | 0.391 | 23.6  | Benign            | NA        |
| Baylor - 011 | c.959A>G  | p.N320S  | deleterious | 0.02 | benign            | 0.077 | 22.4  | <b>Pathogenic</b> | 9/282728  |
|              | c.2984C>G | p.S995C  | deleterious | 0    | probably_damaging | 0.995 | 31    | Benign            | NA        |
| CDG - 0017   | c.1576G>A | p.G526R  | deleterious | 0    | possibly_damaging | 0.657 | 26.7  | <b>Pathogenic</b> | 4/251224  |
|              | c.1576G>A | p.G526R  | deleterious | 0    | possibly_damaging | 0.657 | 26.7  | <b>Pathogenic</b> | 4/251224  |
| CDG - 0104   | c.5959C>G | p.L1987V | deleterious | 0    | probably_damaging | 0.992 | 26.4  | <b>Pathogenic</b> | NA        |
|              | c.5959C>G | p.L1987V | deleterious | 0    | probably_damaging | 0.992 | 26.4  | <b>Pathogenic</b> | NA        |
| CDG - 0105   | c.5959C>G | p.L1987V | deleterious | 0    | probably_damaging | 0.992 | 26.4  | <b>Pathogenic</b> | NA        |
|              | c.5959C>G | p.L1987V | deleterious | 0    | probably_damaging | 0.992 | 26.4  | <b>Pathogenic</b> | NA        |
| CDG - 0111   | c.6329G>T | p.R2110L | tolerated   | 0.2  | Benign            | 0.046 | 16.83 | <b>Pathogenic</b> | 1/251314  |
|              | c.6329G>T | p.R2110L | tolerated   | 0.2  | Benign            | 0.046 | 16.83 | <b>Pathogenic</b> | 1/251314  |
| CDG - 0112   | c.3098G>A | p.R1033Q | deleterious | 0.01 | possibly_damaging | 0.537 | 31    | <b>Pathogenic</b> | 7/251346  |
|              | c.3098G>A | p.R1033Q | deleterious | 0.01 | possibly_damaging | 0.537 | 31    | <b>Pathogenic</b> | 7/251346  |
| CDG - 0117   | c.5957G>A | p.R1986Q | deleterious | 0.01 | probably_damaging | 0.992 | 33    | <b>Pathogenic</b> | 3/249932  |
|              | c.5957G>A | p.R1986Q | deleterious | 0.01 | probably_damaging | 0.992 | 33    | <b>Pathogenic</b> | 3/249932  |
| CDG - 0118   | c.6382G>A | p.E2128K | tolerated   | 0.15 | possibly_damaging | 0.578 | 26.2  | <b>Pathogenic</b> | NA        |

|            |                                       |          |             |      |                   |       |       |                   |            |
|------------|---------------------------------------|----------|-------------|------|-------------------|-------|-------|-------------------|------------|
|            | c.6382G>A                             | p.E2128K | tolerated   | 0.15 | possibly_damaging | 0.578 | 26.2  | <b>Pathogenic</b> | NA         |
| CDG - 0122 | c.3512C>A                             | p.P1171Q | deleterious | 0    | probably_damaging | 0.936 | 28.4  | <b>Pathogenic</b> | 1/251476   |
|            | c.4315-1G>A                           | NA       | NA          | NA   | NA                | NA    | 34    | NA                | 1/31408    |
| CDG - 0123 | c.2995G>A                             | p.V999M  | deleterious | 0    | probably_damaging | 1     | 29.8  | <b>Pathogenic</b> | NA         |
|            | c.2995G>A                             | p.V999M  | deleterious | 0    | probably_damaging | 1     | 29.8  | <b>Pathogenic</b> | NA         |
| CDG - 0278 | c.98T>G                               | p.M33R   | deleterious | 0    | benign            | 0.223 | 24.9  | <b>Pathogenic</b> | 1/243848   |
|            | c.98T>G                               | p.M33R   | deleterious | 0    | benign            | 0.223 | 24.9  | <b>Pathogenic</b> | 1/243848   |
| CDG - 0443 | c.713G>A<br>Uniparental disomy Chr. 2 | p.R238H  | deleterious | 0.05 | benign            | 0.104 | 18.27 | Benign            | 109/282876 |
| CDG - 1000 | c.4669C>G                             | p.L1557V | tolerated   | 0.13 | benign            | 0.003 | 21.9  | Benign            | 62/282658  |
|            | c.6320C>G                             | p.P2107R | tolerated   | 0.15 | benign            | 0     | 16.49 | Benign            | 2/282698   |
| CDG - 1001 | c.2386C>A                             | p.P796T  | tolerated   | 0.53 | benign            | 0.039 | 21.1  | <b>Pathogenic</b> | 10/282430  |
|            | c.4735G>A                             | p.E1579K | tolerated   | 0.26 | possibly_damaging | 0.624 | 23.7  | Benign            | 5/250930   |
| CDG - 1046 | c.887G>A                              | p.G296E  | deleterious | 0    | probably_damaging | 1     | 26.4  | <b>Pathogenic</b> | 6/251446   |
|            | c.2225G>A                             | p.R742Q  | deleterious | 0.03 | benign            | 0.414 | 25.3  | <b>Pathogenic</b> | NA         |

<sup>a</sup> CAD-deficient subjects are denoted with gray background

<sup>b</sup> cDNA (NM\_004341.5), Uniprot ID (P27708)

<sup>c</sup> SIFT Value (Closer to 0 is damaging), Polyphen (Closer to 1 is damaging), CADD (20 puts variant in top 1% of deleterious variants, 30 in top 0.1%)

\*This individual was found to have both variants in *cis*.

## **Supplementary Information**

### **Cell-based analysis of *CAD* variants identifies individuals likely to benefit from uridine therapy**

Francisco del Caño-Ochoa, PhD<sup>#,1,2</sup>, Bobby G. Ng, BS<sup>#,3</sup>, Malak Abedalthagafi, MD<sup>4</sup>, Mohammed Almannai, MD<sup>5</sup>, Ronald D. Cohn, MD<sup>6,7,8,9</sup>, Gregory Costain, MD<sup>6,10</sup>, Orly Elpeleg, MD<sup>11</sup>, Henry Houlden, MD, PhD<sup>12</sup>, Ehsan Ghayoor Karimiani, MD, PhD<sup>13</sup>, Pengfei Liu, PhD<sup>14,15</sup>, M. Chiara Manzini, PhD<sup>16</sup>, Reza Maroofian, PhD<sup>12</sup>, Michael Muriello, MD<sup>17,18</sup>, Ali Al-Otaibi, MD<sup>19</sup>, Hema Patel, MD<sup>20</sup>, Edvardson Shimon, MD<sup>21</sup>, V. Reid Sutton, MD<sup>22</sup>, Mehran Beiraghi Toosi, MD<sup>23</sup>, Lynne A. Wolfe, MS, CRNP, BC<sup>24</sup>, Jill A. Rosenfeld, MS<sup>14,15</sup>, Hudson H. Freeze, PhD<sup>\*,3</sup> and Santiago Ramón-Maiques, PhD<sup>\*,1,2</sup>

**Table S1. Oligonucleotides used for site-directed mutagenesis, CRISPR/Cas9 editing and cloning.**

| Mutation <sup>a</sup> | Primer  | Sequence (5' – 3')                                     |
|-----------------------|---------|--------------------------------------------------------|
| M33R                  | Forward | TTT CAA ACC GGC <b>AGG</b> GTC GGC TAC CCC GAG         |
|                       | Reverse | CTC GGG GTA GCC GAC <b>CCT</b> GCC GGT TTG AAA         |
| Q140R                 | Forward | GGG AAG CTG GTC <b>CGG</b> AAT GGA ACA GAA             |
|                       | Reverse | TTC TGT TCC ATT <b>CCG</b> GAC CAG CTT CCC             |
| R238H                 | Forward | GTA TCC ACA CTG AGC <b>CAT</b> GTT TTA TCT GAG C       |
|                       | Reverse | G CTC AGA TAA AAC <b>ATG</b> GCT CAG TGT GGA TAC       |
| C252S                 | Forward | CCT GTC TTT GGG ATC <b>AGC</b> CTG GGA CAC CAG CTA     |
|                       | Reverse | TAG CTG GTG TCC CAG <b>GCT</b> GAT CCC AAA GAC AGG     |
| I262T                 | Forward | TTG GCC TTA GCC <b>ACC</b> GGG GCC AAG ACT             |
|                       | Reverse | AGT CTT GGC CCC <b>GGT</b> GGC TAA GGC CAA             |
| G296E                 | Forward | ACA TCC CAG AAC CAT <b>GAG</b> TTT GCT GTG GAG ACA G   |
|                       | Reverse | C TGT CTC CAC AGC AAA <b>CTC</b> ATG GTT CTG GGA TGT   |
| A315T                 | Forward | CTC TTC ACC AAC <b>ACC</b> AAT GAT GGT TCC             |
|                       | Reverse | GGA ACC ATC ATT <b>GGT</b> GTT GGT GAA GAG             |
| N320S                 | Forward | AT GAT GGT TCC <b>AGC</b> GAA GGC ATT GTG C            |
|                       | Reverse | G CAC AAT GCC TTC <b>GCT</b> GGA ACC ATC AT            |
| G387S                 | Forward | ATT CCC ACT CCC <b>AGC</b> TCT GGA CTT CCA             |
|                       | Reverse | TGG AAG TCC AGA <b>GCT</b> GGG AGT GGG AAT             |
| H627N                 | Forward | GAC CCA CTG GGC ATC <b>AAC</b> ACT GGT GAG TCC ATA     |
|                       | Reverse | TAT GGA CTC ACC AGT <b>GTT</b> GAT GCC CAG TGG GTC     |
| E682Q                 | Forward | CAG TAT TAC ATC ATT <b>CAG</b> GTG AAT GCC AGG CTC     |
|                       | Reverse | GAG CCT GGC ATT CAC <b>CTG</b> AAT GAT GTA ATA CTG     |
| R742Q                 | Forward | GTG GTG AAG ATT CCT <b>CAA</b> TGG GAC CTT AGC AAG     |
|                       | Reverse | CTT GCT AAG GTC CCA <b>TTG</b> AGG AAT CTT CAC CAC     |
| D791A                 | Forward | TGT GTG GGC TTT <b>GCC</b> CAC ACA GTG AAA             |
|                       | Reverse | TTT CAC TGT GTG <b>GGC</b> AAA GCC CAC ACA             |
| P796T                 | Forward | CAC ACA GTG AAA <b>ACA</b> GTC AGC GAT ATG GAG         |
|                       | Reverse | CTC CAT ATC GCT GAC <b>TGT</b> TTT CAC TGT GTG         |
| S995C                 | Forward | TTT GAT GAG ATC <b>TGC</b> TTT GAG GTG GTG             |
|                       | Reverse | CAC CAC CTC AAA <b>GCA</b> GAT CTC ATC AAA             |
| V999M                 | Forward | GAG GTG <b>ATG</b> ATG GAC ATC TAT GAG CTC GAG AAC     |
|                       | Reverse | GTC CAT <b>CAT</b> CAC CTC AAA AGA GAT CTC ATC AAA G   |
| R1033Q                | Forward | CGG CAG CAG TGC <b>CAG</b> GTG CTG GGC ACC             |
|                       | Reverse | GGT GCC CAG CAC <b>CTG</b> GCA CTG CTG CCG             |
| P1171Q                | Forward | ACC CCC <b>CAG</b> CAA GAT ATC ACT GCC AAA ACC CTG GAG |
|                       | Reverse | ATC TTG <b>CTG</b> GGG GGT CAC CAG CGT CGC ATC ACC TG  |
| V1217I                | Forward | GTT ATT GAA TGC AAC <b>ATC</b> CGT GTC TCT CGC TCC     |
|                       | Reverse | GGA GCG AGA GAC ACG <b>GAT</b> GTT GCA TTC AAT AAC     |
| G1290S                | Forward | GGG GAG GTG GCC <b>AGC</b> TTT GGG GAG AGC             |
|                       | Reverse | GCT CTC CCC AAA <b>GCT</b> GGC CAC CTC CCC             |
| G1496A                | Forward | GCC CTG GCT GGG <b>GCC</b> ATC ACC ATG GTG             |
|                       | Reverse | CAC CAT GGT GAT <b>GGC</b> CCC AGC CAG GGC             |
| C1501S                | Forward | ATC ACC ATG GTG <b>AGC</b> GCC ATG CCT AAT             |
|                       | Reverse | ATT AGG CAT GGC <b>GCT</b> CAC CAT GGT GAT             |
| A1523V                | Forward | CTG GCC CAG AAG CTG <b>GTG</b> GAG GCT GGC GCC CGG     |
|                       | Reverse | CCG GGC GCC AGC CTC <b>CAC</b> CAG CTT CTG GGC CAG     |
| K1556T                | Forward | GCA GCC GGG CTG <b>ACC</b> CTT TAC CTC AAT             |



|                            |                |                                                        |
|----------------------------|----------------|--------------------------------------------------------|
|                            | <i>Reverse</i> | ATT GAG GTA AAG <b>GGT</b> CAG CCC GGC TGC             |
| L1557V                     | <i>Forward</i> | GCA GCC GGG CTG AAG <b>GTG</b> TAC CTC AAT GAG ACC     |
|                            | <i>Reverse</i> | GGT CTC ATT GAG GTA <b>CAC</b> CTT CAG CCC GGC TGC     |
| E1579K                     | <i>Forward</i> | TG GAG CAT TTC <b>AAG</b> ACA TGG CCC                  |
|                            | <i>Reverse</i> | GGG CCA TGT <b>CTT</b> GAA ATG CTC CAT C               |
| D1686N                     | <i>Forward</i> | GC TTT GCC TCA <b>AAC</b> CAT GCT CCC CAT ACC TTG G    |
|                            | <i>Reverse</i> | C CAA GGT ATG GGG AGC ATG <b>GTT</b> TGA GGC AAA GC    |
| T1716M                     | <i>Forward</i> | CCA CTA CTC CTG <b>ATG</b> GCT GTA AGC GAG             |
|                            | <i>Reverse</i> | CTC GCT TAC AGC <b>CAT</b> CAG GAG TAG TGG             |
| R1785C                     | <i>Forward</i> | GGC ACC GTC CGC <b>TGC</b> GTG GTC CTG CGA             |
|                            | <i>Reverse</i> | TCG CAG GAC CAC <b>GCA</b> GCG GAC GGT GCC             |
| R1854Q                     | <i>Forward</i> | CAT CTG CCG CCC <b>CAG</b> ATC CAT CGA GCC             |
|                            | <i>Reverse</i> | GGC TCG ATG GAT <b>CTG</b> GGG CGG CAG ATG             |
| R1857Q                     | <i>Forward</i> | CCC CGA ATC CAT <b>CAG</b> GCC TCC GAC CCA             |
|                            | <i>Reverse</i> | TGG GTC GGA GGC <b>CTG</b> ATG GAT TCG GGG             |
| R1986Q                     | <i>Forward</i> | GCA GCA GCC ATG GCC <b>CAG</b> CTG GGA GGT GCT GTG     |
|                            | <i>Reverse</i> | CAC AGC ACC TCC CAG <b>CTG</b> GGC CAT GGC TGC TGC     |
| L1987V                     | <i>Forward</i> | GCA GCC ATG GCC CGG <b>GTG</b> GGA GGT GCT GTG C       |
|                            | <i>Reverse</i> | G CAC AGC ACC TCC <b>CAC</b> CCG GGC CAT GGC TGC       |
| R2024Q                     | <i>Forward</i> | GTC GTC GTG CTC <b>CAG</b> CAC CCC CAG CCT GG          |
|                            | <i>Reverse</i> | CC AGG CTG GGG <b>GTG</b> CTG GAG CAC GAC GAC          |
| R2110L                     | <i>Forward</i> | GCA CCT CCC AGC CTG <b>CTG</b> ATG CCA CCC ACT GTG     |
|                            | <i>Reverse</i> | CAC AGT GGG TGG CAT <b>CAG</b> CAG GCT GGG AGG TGC     |
| E2128K                     | <i>Forward</i> | CGC GGC ACC AAG CAG GAG <b>AAG</b> TTC GAG AGC ATT GAG |
|                            | <i>Reverse</i> | CTC AAT GCT CTC GAA <b>CTT</b> CTC CTG CTT GGT GCC GCG |
| P2107R                     | <i>Forward</i> | CGC TAC GTG GCA CCT <b>CGC</b> AGC CTG CGC ATG CCA     |
|                            | <i>Reverse</i> | TGG CAT GCG CAG GCT <b>GCG</b> AGG TGC CAC GTA GCG     |
| P2186S                     | <i>Forward</i> | ATG CAC CCG ATG <b>AGC</b> CGT GTC AAC GAG             |
|                            | <i>Reverse</i> | CTC GTT GAC ACG <b>GCT</b> CAT CGG GTG CAT             |
| <b>CRISPR<sup>b</sup></b>  | <b>Primer</b>  | <b>Sequence (5' – 3')</b>                              |
| sgRNA1                     | <i>Forward</i> | caccGGCCGCCGTGTCGACTGCCG                               |
|                            | <i>Reverse</i> | aaacCGGCAGTTCGACACGGCGGCC                              |
| sgRNA2                     | <i>Forward</i> | caccGCGACCCGTCTCCAACACTA                               |
|                            | <i>Reverse</i> | aaacTAGTGTGGAGGACGGGTCGC                               |
| sgRNA3                     | <i>Forward</i> | caccGTTCCCGGCAGTCGACACGG                               |
|                            | <i>Reverse</i> | aaacCCGTGTCGACTGCCGGGGAAC                              |
| <b>cloning<sup>c</sup></b> | <b>Primer</b>  | <b>Sequence (5' – 3')</b>                              |
| huCAD                      | <i>Forward</i> | agcacagtggcggccgcATGGCGGCCCTAGTGTG                     |
|                            | <i>Reverse</i> | aaacgggccctctagactagAAACGGCCCAGCAC                     |
| exon1                      | <i>Forward</i> | TTCCAGTGGAGTTTGCAGTC                                   |
|                            | <i>Reverse</i> | CTTGACAGAGACCGAACTCAT                                  |

<sup>a</sup> Nucleotides in red introduce clinical variant.

<sup>b</sup> Lower case sequence is complementary with restriction site.

<sup>c</sup> Lower case sequence indicates region for In-Fusion cloning.
